# Supplementary material for: Unifying host-associated diversification processes using butterfly–plant networks
Source: PubMed Central journal article supplement (PMC6279759; doi:10.1038/s41467-018-07677-x), 2018-12-04
Supplement: 41467_2018_7677_MOESM1_ESM.pdf [file 41467_2018_7677_MOESM1_ESM.pdf]

## **Description of Additional Supplementary Files**

File Name: Supplementary Software 1

Description: R script to simulate theoretical diversification models and generate networks.
